# Supplementary material for: A Systematic Review of Circulatory microRNAs in Major Depressive Disorder: Potential Biomarkers for Disease Prognosis
Source: MDPI journal article supplement (doi:10.3390/ijms23031294), 2022-01-24
Supplement: s1 [file s1]

**Supplementary Table S2:** Data from 32 studies of cimiRNAs in depression

| S.No | Reference                   | miRNA                                         | miRNA                                                                       | Biofluid               | Country | ROC | Validation                | Diagnostic Criteria (Severity) | Depression Subjects | RNA Extraction Method       | Mirna Detection Strategy | Reference Gene | Male         | Female       | Age        |
|------|-----------------------------|-----------------------------------------------|-----------------------------------------------------------------------------|------------------------|---------|-----|---------------------------|--------------------------------|---------------------|-----------------------------|--------------------------|----------------|--------------|--------------|------------|
|      |                             | (Up)                                          | (Down)                                                                      |                        |         |     |                           |                                |                     |                             |                          |                |              |              |            |
| 1    | (Liang et al., 2020)        | miR-139-5p                                    |                                                                             | Serum (exosome)        | china   | YES | miR-139-5p                | HAMD, DSM-V, MADRS             | 30/30               | TRIzol reagent              | RT-qPCR                  | miR-16         | 20           | 10           | 32.6±10.87 |
| 2    | (H. Zhang et al., 2020)     |                                               | miR-134                                                                     | plasma                 | china   | YES | miR-134                   | HAM-D                          | 100/100             | TRIzol reagent              | RT-qPCR                  | U6             | 37           | 63           | 20-40      |
| 3    | (Wei et al., 2020)          | miR-139-5p                                    |                                                                             | Blood derived exosomes | china   | YES | miR-139-5p                | HAMD, DSM-IV, MADRS            | 33                  | TRIzol reagent              | RT-qPCR                  | miR-16         |              |              |            |
| 4    | (Mendes-silva et al., 2019) |                                               | miR-184, miR-100-5p, miR-1-3p, miR-140-3p, miR-5572, miR-125b-5p, let-7a-5p | Plasma                 | Brazil  | YES | miR-184                   | DSM-V, HDRS-21                 | 63/53               | mirVana PARIS kit           | NGS + qPCR               | U6             | 11           | 52           | 60-80      |
| 5    | (Kyunghe et al., 2019)      | miR-16-5p, miR-146a-5p, miR-21-5p, miR-30b-5p |                                                                             | Plasma                 | Canada  |     |                           | Not reported                   | Not reported        | mirVana miRNA isolation kit | NGS                      | Not reported   | Not reported | Not reported | 42-50      |
| 6    | (Hung et al., 2019)         | let-7e, miR-21-5p,                            | miR-146a, miR-155                                                           | PBMC (whole blood)     | Taiwan  |     | miR-146a, miR-155, let-7e | DSM-V, HAMD                    | 84/43               | Quick-RNA MiniPrep kits     | RT-qPCR                  | U6             | 20           | 64           | 20-65      |

|   |                             |                                                                                                                                                  |                                                                                                                                                                                                                                    |                 |       |     |           |              |       |                            |      |    |    |    |             |
|---|-----------------------------|--------------------------------------------------------------------------------------------------------------------------------------------------|------------------------------------------------------------------------------------------------------------------------------------------------------------------------------------------------------------------------------------|-----------------|-------|-----|-----------|--------------|-------|----------------------------|------|----|----|----|-------------|
|   |                             | miR-223                                                                                                                                          |                                                                                                                                                                                                                                    |                 |       |     |           |              |       |                            |      |    |    |    |             |
| 7 | (Kuang et al., 2019)        | miR-34a-5p, miR-221-3p                                                                                                                           | miR-451a                                                                                                                                                                                                                           | serum           | china |     | validated | DSM-IV, HAMD | 84/78 | Qaigen kit (USA)           | qPCR | U6 | 30 | 54 | 35.51-13.62 |
| 8 | (Gheysarzadeh et al., 2018) |                                                                                                                                                  | miR-16, miR-135a, miR-1202                                                                                                                                                                                                         | serum           | Iran  | YES | validated | DSM-IV       | 39/36 | TRIzol reagent             | qPCR | U6 | 18 | 21 | 20-40       |
| 9 | (Y. Zhang et al., 2018)     | miR-1255a, miR-3161, miR-99a-3p, miR-205-5p, miR-26a-1-3p, miR-139-5p, miR-7849-3p, miR-195-5p, miR-125b-2-3p, miR-7ca-3p, let-7c-5p, miR-197-3p | miR-449a-5p, miR-4732-3p, miR-222-5p, miR-1291, miR-668-3p, miR-425-3p, miR-6511a-3p, miR-145-3p, miR-200a-3p, miR-143-3p, miR-196b-5p, miR-99a-5p, miR-144-3p, miR-584-5p, miR-210-3p, miR-183-5p, miR-107, miR-130b-5p, miR-589- | Serum (exosome) | china |     | discovery | MADRS-S      |       | ExoRNeasy serum/plasma kit | NGS  |    |    |    | 20-64       |

|    |                            |                                                  |                                              |              |           |     |                                                        |                      |       |                                                                              |                                                                    |           |     |     |         |
|----|----------------------------|--------------------------------------------------|----------------------------------------------|--------------|-----------|-----|--------------------------------------------------------|----------------------|-------|------------------------------------------------------------------------------|--------------------------------------------------------------------|-----------|-----|-----|---------|
|    |                            |                                                  | 5p, miR-1910-5p                              |              |           |     |                                                        |                      |       |                                                                              |                                                                    |           |     |     |         |
| 10 | (Fang et al., 2018)        | miR-132, miR-124                                 |                                              | Plasma       | china     |     | validation                                             | HAMD, HAMA           | 45/32 | miRcute miRNA isolation kit                                                  | qPCR                                                               | 5S rRNA   | 19  | 26  | 40      |
| 11 | (Marques et al., 2017)     |                                                  | miR-19a-3p                                   | plasma       | Australia |     | miR-19a-3p                                             | DSM-IV               | 32/55 | miRNeasy serum/plasma kit (qiagen)                                           | qPCR                                                               | miR-17-5p | 32  |     | 40      |
| 12 | (Fiori et al., 2017)       | miR-16                                           | miR-1202, miR-135                            | Whole blood  | Canada    | YES | validation                                             | HAMD, MADRS          | 200   | miRNeasy serum/plasma kit (qiagen), PAXgene Blood miRNA Kit (Qiagen, Canada) | qPCR                                                               |           |     |     |         |
| 13 | (Lopez et al., 2017)       | miR-146a-5p, miR-146b-5p, miR-24-3p, miR-425-3p, |                                              | BLOOD/PLASMA | EUROPE    |     | Discovery and validation                               | MADRS                | 319   | PAXgene Blood miRNA Kit (Qiagen, Canada)                                     | NGS+ FlexArray package (microarray) + TaqMan RT-PCR microRNA assay | RNU6B     | 161 | 326 | 19-74   |
| 14 | (Roy et al., 2017)         | miR-124                                          |                                              | serum        | USA       |     | validation                                             | MADRS                | 18/17 | TRIzol reagent                                                               | qPCR                                                               | U6        |     |     |         |
| 15 | (Maffioletti et al., 2016) | miR-199a, miR-24-3p, miR-425-3p                  | let-7a-5p, let-7d-5p, let-7f-5p, miR-1915-3p | blood        | Italy-UK  |     | miR-24-3p, miR-425-3p, let-7a-5p, let-7d-5p, let-7f-5p | DSM-IV<br>HAMD, HAMA | 20/20 | PAXGene Blood miRNA Kit                                                      | TaqMan Microarray assay, RT-qPCR                                   | U6        | 3   | 17  | 24-40.7 |

|    |                          |                                                             |          |            |         |     |                        |                    |       |                            |                                  |    |    |    |       |
|----|--------------------------|-------------------------------------------------------------|----------|------------|---------|-----|------------------------|--------------------|-------|----------------------------|----------------------------------|----|----|----|-------|
| 16 | (Gururajan et al., 2016) | let-7b, let-7c, miR-16, miR-182, miR-451, miR-223           |          | blood      | Ireland |     | let-7b, let-7c         | HDRS               | 40/20 | PAXGene Blood miRNA Kit    | TaqMan Microarray assay, RT-qPCR | -  |    |    | 35-42 |
| 17 | (Liu et al., 2016)       | miR-132                                                     |          | blood      | China   |     | miR-132                | DSM-IV HAMD, HAMA  | 62/73 | MagMAX RNA Isolation Kit   | RT-qPCR                          | U6 | 22 | 40 | 20-36 |
| 18 | (He et al., 2016)        | miR-124                                                     |          | PBMCs      | china   | YES | miR-124                | DSM-IV HDRS        | 32/30 | mirVana TM miRNA Isolation | RT-qPCR                          | U6 | 12 | 30 | 24-44 |
| 19 | (Sun et al., 2016)       | miR-34b-5p, miR-34c-5p, miR-369-3p, miR-381, miR-107        |          | PBMCs      | china   |     | miR-34b-5p, miR-34c-5p | DSM-IV,            | 32/30 | TRIzol reagent             | RT-qPCR                          | U6 | 13 | 19 | 35-45 |
| 20 | (Enatescu et al., 2016)  | miR-146a-5p, miR-146b-5p, miR-221-3p, miR-24-3p, miR-26a-5p |          | Plasma     | Romania |     |                        | DSM-IV, HDRS, HAMD |       | miRNeasy Serum/Plasma kit  | Microarray assay, qRT-PCR        |    |    |    | 18-65 |
| 21 | (Wan et al., 2015)       | miR-221-3p,                                                 | miR-451a | CSF, Blood | china   | YES | miR-221-3p, miR-       | DSM-IV, HDRS       | 38/27 | TRIzol reagent             | qRT-PCR                          |    | 18 | 20 | 24-45 |

|    |                        |                                 |                                                                          |            |                |     |                                                 |                       |        |                               |                           |       |    |    |       |
|----|------------------------|---------------------------------|--------------------------------------------------------------------------|------------|----------------|-----|-------------------------------------------------|-----------------------|--------|-------------------------------|---------------------------|-------|----|----|-------|
|    |                        | miR-34a-5p, let-7d-3p           |                                                                          |            |                |     | 34a-5p, let-7d-3p, miR-451a                     |                       |        |                               |                           |       |    |    |       |
| 22 | (Su et al., 2015)      | miR-132                         |                                                                          | blood      | China          |     | miR-132                                         |                       | 30/30  | kit                           | qRT-PCR                   | U6    |    |    |       |
| 23 | (J. Li et al., 2015)   |                                 | miR-335                                                                  | blood      | China          |     | miR-335                                         | DSM-IV, HAMD          | 18/18  | miRNeasy Mini Kit             | qRT-PCR                   | U6    | 8  | 10 | 20-30 |
| 24 | (Camkurt et al., 2015) | miR-451a, miR-17-5p, miR-223-3p | miR-320a,                                                                | plasma     | Turkey         |     | miR-451a, miR-320a,                             | DSM-IV, HDRS, MADRS   | 50/41  | High Pure miRNA Isolation Kit | qRT-PCR                   |       | 15 | 35 | 25-50 |
| 25 | (Wang et al., 2015)    |                                 | miR-144-5p, miR-92b-3p, miR-885-5p, miR-30a-5p, miR-29a-5p, miR-29b-2-5p | plasma     | Sweden         |     | miR-144-5p                                      | HADS-A, HADS-D, MADRS | 169/52 | miRNeasy Mini Ki              | qRT-PCR                   |       | 13 | 86 | 20-64 |
| 26 | (Song et al., 2015)    |                                 | miR-16                                                                   | CSF, Blood | china          |     | miR-16                                          | HAMD                  | 36/30  | miRcute miRNA Isolation Kit   | qRT-PCR                   | U6    | 15 | 21 | 18-45 |
| 27 | (Lopez et al., 2014)   |                                 | miR-1202                                                                 | blood      | Canada         |     | miR-1202                                        | DSM-IV                | 50/29  | miRNeasy Mini Kit             | Microarray assay, qRT-PCR | RNU6B |    |    |       |
| 28 | (Issler et al., 2014)  |                                 | miR-135                                                                  | blood      | Israel and USA |     | miR-135                                         | HDRS                  | 12/12  | PAXgene Blood RNA Kit         | qRT-PCR                   |       |    |    |       |
| 29 | (Fan et al., 2014)     |                                 | miR-26b, miR-1972, miR-4485, miR-4498, miR-4743                          | PBMC       | China          | YES | miR-26b, miR-1972, miR-4485, miR-4498, miR-4743 | DSM-IV                | 81/46  | mirVana kit                   | Microarray assay, qRT-PCR | RNU48 | 35 | 46 | 27-30 |

|    |                                  |                                                                                      |                                                |       |        |  |                                  |                |       |                                           |                           |             |    |    |       |
|----|----------------------------------|--------------------------------------------------------------------------------------|------------------------------------------------|-------|--------|--|----------------------------------|----------------|-------|-------------------------------------------|---------------------------|-------------|----|----|-------|
| 30 | (Y. J. Li et al., 2013)          | miR-132, miR-182                                                                     |                                                | Serum | China  |  | <a href="#">miR-132, miR-182</a> | DSM-IV, CCMD-3 | 40/40 | mirVana <sup>TM</sup> miRNA isolation kit | qRT-PCR                   | 5SrRNA      | 20 | 20 | 23-61 |
| 31 | (Bocchio-Chiavetto et al., 2013) |                                                                                      | miR-34c-5p, miR-770-5p                         | blood | Italy  |  |                                  | DSM-IV, HAMD   | 10/10 | PAXgene Blood RNA Kit                     | miRNome analysis, qRT-PCR | U44 and U48 | 5  | 5  | 18-65 |
| 32 | (Belzeaux et al., 2012)          | miR-589, miR-579, miR-941, miR-133a, miR-494, miR-107, miR-148a, miR-652, miR-425-3p | miR-517b, miR-636, miR-1243, miR-381, miR-200c | blood | France |  |                                  | DSM-IV, HDRS   | 16-13 | mirVana miRNA isolation kit               | Microarray assay, qRT-PCR |             | 9  | 7  | 35-75 |

## References

1. Belzeaux, R., Bergon, A., Jeanjean, V., Lioriod, B., Formisano-Tréziny, C., Verrier, L., Loundou, A., Baumstarck-Barrau, K., Boyer, L., Gall, V., Gabert, J., Nguyen, C., Azorin, J. M., Naudin, J., & Ibrahim, E. C. (2012). Responder and nonresponder patients exhibit different peripheral transcriptional signatures during major depressive episode. *Translational Psychiatry*, 2(September). <https://doi.org/10.1038/tp.2012.112>
2. Bocchio-Chiavetto, L., Maffioletti, E., Bettinsoli, P., Giovannini, C., Bignotti, S., Tardito, D., Corrada, D., Milanese, L., & Gennarelli, M. (2013). Blood microRNA changes in depressed patients during antidepressant treatment. *European Neuropsychopharmacology*, 23(7), 602–611. <https://doi.org/10.1016/j.euroneuro.2012.06.013>
3. Camkurt, M. A., Acar, Ş., Coşkun, S., Güneş, M., Güneş, S., Yilmaz, M. F., Görür, A., & Tamer, L. (2015). Comparison of plasma MicroRNA levels in drug naive, first episode depressed patients and healthy controls. *Journal of Psychiatric Research*, 69, 67–71. <https://doi.org/10.1016/j.jpsychires.2015.07.023>

4. Enatescu, V. R., Papava, I., Enatescu, I., Antonescu, M., Anghel, A., Seclaman, E., Sirbu, I. O., & Marian, C. (2016). Circulating plasma micro RNAs in patients with major depressive disorder treated with antidepressants: A pilot study. *Psychiatry Investigation*, 13(5), 549–557. <https://doi.org/10.4306/pi.2016.13.5.549>
5. Fan, H. min, Sun, X. Y., Guo, W., Zhong, A. F., Niu, W., Zhao, L., Dai, Y. H., Guo, Z. M., Zhang, L. Y., & Lu, J. (2014). Differential expression of microRNA in peripheral blood mononuclear cells as specific biomarker for major depressive disorder patients. *Journal of Psychiatric Research*, 59, 45–52. <https://doi.org/10.1016/j.jpsychires.2014.08.007>
6. Fang, Y., Qiu, Q., Zhang, S., Sun, L., Li, G., Xiao, S., & Li, X. (2018). Changes in miRNA-132 and miR-124 levels in non-treated and citalopram-treated patients with depression. *Journal of Affective Disorders*, 227, 745–751. <https://doi.org/10.1016/j.jad.2017.11.090>
7. Fiori, L. M., Lopez, J. P., Richard-Devantoy, S., Berlim, M., Chachamovich, E., Jollant, F., Foster, J., Rotzinger, S., Kennedy, S. H., & Turecki, G. (2017). Investigation of miR-1202, miR-135a, and miR-16 in Major Depressive Disorder and Antidepressant Response. *International Journal of Neuropsychopharmacology*, 20(8), 619–623. <https://doi.org/10.1093/ijnp/pyx034>
8. Gheysarzadeh, A., Sadeghifard, N., Afraidooni, L., Pooyan, F., Mofid, M., Valadbeigi, H., Bakhtiari, H., & Keikhavani, S. (2018). Serum-based microRNA biomarkers for major depression: MiR-16, miR-135a, and miR-1202. *Journal of Research in Medical Sciences*, 23(1), 69. [https://doi.org/10.4103/jrms.jrms\\_879\\_17](https://doi.org/10.4103/jrms.jrms_879_17)
9. Gururajan, A., Naughton, M. E., Scott, K. A., O'Connor, R. M., Moloney, G., Clarke, G., Dowling, J., Walsh, A., Ismail, M. F., Shorten, G., Scott, L., McLoughlin, D. M., Cryan, J. F., & Dinan, T. G. (2016). MicroRNAs as biomarkers for major depression: A role for let-7b and let-7c. *Translational Psychiatry*, 6(8), e862–e862. <https://doi.org/10.1038/tp.2016.131>
10. He, S., Liu, X., Jiang, K., Peng, D., Hong, W., Fang, Y., Qian, Y., Yu, S., & Li, H. (2016). Alterations of microRNA-124 expression in peripheral blood mononuclear cells in pre- and post-treatment patients with major depressive disorder. *Journal of Psychiatric Research*, 78, 65–71. <https://doi.org/10.1016/j.jpsychires.2016.03.015>
11. Hung, Y., Wu, M., Tsai, M., & Huang, Y. (2019). *and miR-155 Correlates with Severity of Depression in Patients with Major Depressive Disorder and Is. Mdd*, 1–12.
12. Issler, O., Haramati, S., Paul, E. D., Maeno, H., Navon, I., Zwang, R., Gil, S., Mayberg, H. S., Dunlop, B. W., Menke, A., Awatramani, R., Binder, E. B., Deneris, E. S., Lowry, C. A., & Chen, A. (2014). MicroRNA 135 is essential for chronic stress resiliency, antidepressant efficacy, and intact serotonergic activity. *Neuron*, 83(2), 344–360. <https://doi.org/10.1016/j.neuron.2014.05.042>
13. Kuang, W.-H., Dong, Z.-Q., Tian, L.-T., & Li, J. (n.d.). *MicroRNA-451a, microRNA-34a-5p, and microRNA-221-3p as predictors of response to antidepressant treatment*. <https://doi.org/10.1590/1414-431X20187212>
14. Kyunghye, H., Tyryshkin, K., Elmi, N., Dharsee, M., Evans, K. R., Good, J., Javadi, M., McCormack, S., Vaccarino, A. L., Zhang, X., Cristina, A., & Feilotter, H. (2019). Plasma microRNA expression levels and their targeted pathways in patients with major depressive disorder who are responsive to duloxetine treatment. *Journal of Psychiatric Research*, 110(December 2018), 38–44. <https://doi.org/10.1016/j.jpsychires.2018.12.007>
15. Li, J., Meng, H., Cao, W., & Qiu, T. (2015). MiR-335 is involved in major depression disorder and antidepressant treatment through targeting GRM4. *Neuroscience Letters*, 606, 167–172. <https://doi.org/10.1016/j.neulet.2015.08.038>
16. Li, Y. J., Xu, M., Gao, Z. H., Wang, Y. Q., Yue, Z., Zhang, Y. X., Li, X. X., Zhang, C., Xie, S. Y., & Wang, P. Y. (2013). Alterations of Serum Levels of BDNF-Related miRNAs in Patients with Depression. *PLoS ONE*, 8(5), 1–7. <https://doi.org/10.1371/journal.pone.0063648>
17. Liang, J. Q., Liao, H. R., Xu, C. X., Li, X. L., Wei, Z. X., Xie, G. J., & Cheng, Y. (2020). Serum exosome-derived miR-139-5p as a potential biomarker for major depressive disorder. *Neuropsychiatric Disease and Treatment*, 16, 2689–2693. <https://doi.org/10.2147/NDT.S277392>
18. Liu, Y., Yang, X., Zhao, L., Zhang, J., Li, T., & Ma, X. (2016). Increased miR-132 level is associated with visual memory dysfunction in patients with depression. *Neuropsychiatric Disease and Treatment*, Volume 12, 2905–2911. <https://doi.org/10.2147/NDT.S116287>

19. Lopez, J. P., Fiori, L. M., Cruceanu, C., Lin, R., Labonte, B., Cates, H. M., Heller, E. A., Vialou, V., Ku, S. M., Gerald, C., Han, M. H., Foster, J., Frey, B. N., Soares, C. N., Müller, D. J., Farzan, F., Leri, F., Macqueen, G. M., Feilolter, H., ... Turecki, G. (2017). MicroRNAs 146a/b-5 and 425-3p and 24-3p are markers of antidepressant response and regulate MAPK/Wnt-system genes. *Nature Communications*, 8(May), 1–12. <https://doi.org/10.1038/ncomms15497>
20. Lopez, J. P., Lim, R., Cruceanu, C., Crapper, L., Fasano, C., Labonte, B., Maussion, G., Yang, J. P., Yerko, V., Vigneault, E., El Mestikawy, S., Mechawar, N., Pavlidis, P., & Turecki, G. (2014). MiR-1202 is a primate-specific and brain-enriched microRNA involved in major depression and antidepressant treatment. *Nature Medicine*, 20(7), 764–768. <https://doi.org/10.1038/nm.3582>
21. Maffioletti, E., Cattaneo, A., Rosso, G., Maina, G., Maj, C., Gennarelli, M., Tardito, D., & Bocchio-Chiavetto, L. (2016). Peripheral whole blood microRNA alterations in major depression and bipolar disorder. In *Journal of Affective Disorders* (Vol. 200). Elsevier. <https://doi.org/10.1016/j.jad.2016.04.021>
22. Marques, F. Z., Eikelis, N., Bayles, R. G., Lambert, E. A., Straznicky, N. E., Hering, D., Esler, M. D., Head, G. A., Barton, D. A., Schlaich, M. P., & Lambert, G. W. (2017). A polymorphism in the norepinephrine transporter gene is associated with affective and cardiovascular disease through a microRNA mechanism. *Molecular Psychiatry*, 22(1), 134–141. <https://doi.org/10.1038/mp.2016.40>
23. Mendes-silva, A. P., Tiemi, P., Regina, J., Lucio, A., Marciano, E., Henrique, P., Guedes, G., Scarabeli, L., Barroso, S., Souza, M. De, Diniz, J., Ferreira, R., Bertola, L., Souza, E. De, Tolentino-araújo, G. T., Moreira, C., Ferreira, S., Sabrina, T., Diniz, L., ... Satler, B. (2019). Brain-enriched MicroRNA-184 is downregulated in older adults with major depressive disorder : A translational study. *Journal of Psychiatric Research*, 111(July 2018), 110–120. <https://doi.org/10.1016/j.jpsychires.2019.01.019>
24. Roy, B., Dunbar, M., Shelton, R. C., & Dwivedi, Y. (2017). Identification of MicroRNA-124-3p as a Putative Epigenetic Signature of Major Depressive Disorder. *Neuropsychopharmacology*, 42(4), 864–875. <https://doi.org/10.1038/npp.2016.175>
25. Song, M. F., Dong, J. Z., Wang, Y. W., He, J., Ju, X., Zhang, L., Zhang, Y. H., Shi, J. F., & Lv, Y. Y. (2015). CSF miR-16 is decreased in major depression patients and its neutralization in rats induces depression-like behaviors via a serotonin transmitter system. *Journal of Affective Disorders*, 178, 25–31. <https://doi.org/10.1016/j.jad.2015.02.022>
26. Su, M., Hong, J., Zhao, Y., Liu, S., & Xue, X. (2015). MeCP2 controls hippocampal brain-derived neurotrophic factor expression via homeostatic interactions with microRNA-132 in rats with depression. *Molecular Medicine Reports*, 12(4), 5399–5406. <https://doi.org/10.3892/mmr.2015.4104>
27. Sun, N., Lei, L., Wang, Y., Yang, C., Liu, Z., Li, X., & Zhang, K. (2016). Preliminary comparison of plasma notch-associated microRNA-34b and -34c levels in drug naive, first episode depressed patients and healthy controls. *Journal of Affective Disorders*, 194, 109–114. <https://doi.org/10.1016/j.jad.2016.01.017>
28. Wan, Y., Liu, Y., Wang, X., Wu, J., Liu, K., Zhou, J., Liu, L., & Zhang, C. (2015). Identification of differential microRNAs in cerebrospinal fluid and serum of patients with major depressive disorder. *PLoS ONE*, 10(3), 1–12. <https://doi.org/10.1371/journal.pone.0121975>
29. Wang, X., Sundquist, K., Hedelius, A., Palmér, K., Memon, A. A., & Sundquist, J. (2015). Circulating microRNA-144-5p is associated with depressive disorders. *Clinical Epigenetics*, 7(1), 1–8. <https://doi.org/10.1186/s13148-015-0099-8>
30. Wei, Z., Xie, G., Mao, X., Zou, X., Liao, Y., Liu, Q., Wang, H., & Cheng, Y. (2020). Exosomes from patients with major depression cause depressive-like behaviors in mice with involvement of miR-139-5p-regulated neurogenesis. *Neuropsychopharmacology*, January. <https://doi.org/10.1038/s41386-020-0622-2>
31. Zhang, H., Liu, X., Chen, J., Cheng, K., Bai, S., Zheng, P., Zhou, C., Wang, W., Wang, H., Zhong, L., & Xie, P. (2020). Circulating microRNA 134 sheds light on the diagnosis of major depressive disorder. *Translational Psychiatry*. <https://doi.org/10.1038/s41398-020-0773-2>
32. Zhang, Y., Zhao, Y., Tian, C., Wang, J., Li, W., & Zhong, C. (2018). Differential exosomal microRNA profile in the serum of a patient with depression. *European Journal of Psychiatry*, 32(3), 105–112. <https://doi.org/10.1016/j.ejpsy.2017.10.002>
